# Supplementary material
Source: PubMed Central journal article supplement (PMC4893320)
Supplement: NIHMS789094-supplement-1.pdf [file NIHMS789094-supplement-1.pdf]

NANO MICRO  
**small**

Supporting Information

for *Small*, DOI: 10.1002/smll.201503188

Enhanced and Differential Capture of Circulating Tumor Cells  
from Lung Cancer Patients by Microfluidic Assays Using  
Aptamer Cocktail

*Libo Zhao, Chuanhao Tang, Li Xu, Zhen Zhang, Xiaoyan Li,  
Haixu Hu, Si Cheng, Wei Zhou, Mengfei Huang, Anna Fong,  
Bing Liu, Hsian-Rong Tseng,\* Hongjun Gao,\* Yi Liu,\* and  
Xiaohong Fang\**

## Supporting Information

### **Enhanced and Differential Capture of Circulating Tumor Cells from Lung Cancer Patients by Microfluidic Assays based on Aptamer Cocktail**

*Libo Zhao, † Chuanhao Tang, † Li Xu, Zhen Zhang, Xiaoyan Li, Haixu Hu, Si Cheng, Wei Zhou, Mengfei Huang, Anna Fong, Bing Liu, Hsian-Rong Tseng, \* Hongjun Gao, \* Yi Liu, \* and Xiaohong Fang\**

**Table S1.** NSCLC specific aptamers and scramble DNA sequence Rc used in this study.

| <i>Aptamer</i> | <i>Sequence</i>                                         |
|----------------|---------------------------------------------------------|
| Ap1            | 5'-TTTATGGGTGGGTGGGGGGTTTTT-3'                          |
| Ap2            | 5'-AGGTGGGTGGGTTGGGTGGATTG-3'                           |
| Ap3            | 5'-GGTTGGTTGG GGTGGGTTG TTTTGGGGT GATATGGGGG TTGGA-3'   |
| Ap4            | 5'-CGGTGGGGGTGGGTAGGTAATCGATAGAGTACGGGGGGTTGGATT-3'     |
| Ap5            | 5'-TAAAGGGCGGGGGGTGGGGTGGTTGGTA-3'                      |
| Ap6            | 5'-CACGTTCCCTCTGTCACCGTCGTCCTTATCATCCGAGCTATCATCCGAG-3' |
| Ap7            | 5'-GGTGGGGTTGTATTGGATTTGAATGGTGGGGGATGGTGGTTGGTG-3'     |
| Ap8            | 5'-GGTTGCATGCCGTGGGGAGGGGGGTGGGTTTTATAGCGTACTCAG-3'     |
| Ap9            | 5'-GTGGCCAGTCACTCAATTGGGTGTAGGGGTGGGGATTGTGGGTTG-3'     |
| Ap10           | 5'-GCTATCTTATGGAAATTCGTGTAGGGTTTGGTGTGGCGGGGCTA-3'      |
| Rc             | 5'-AATTTTTTAATTATTTATATTAAT-3'                          |

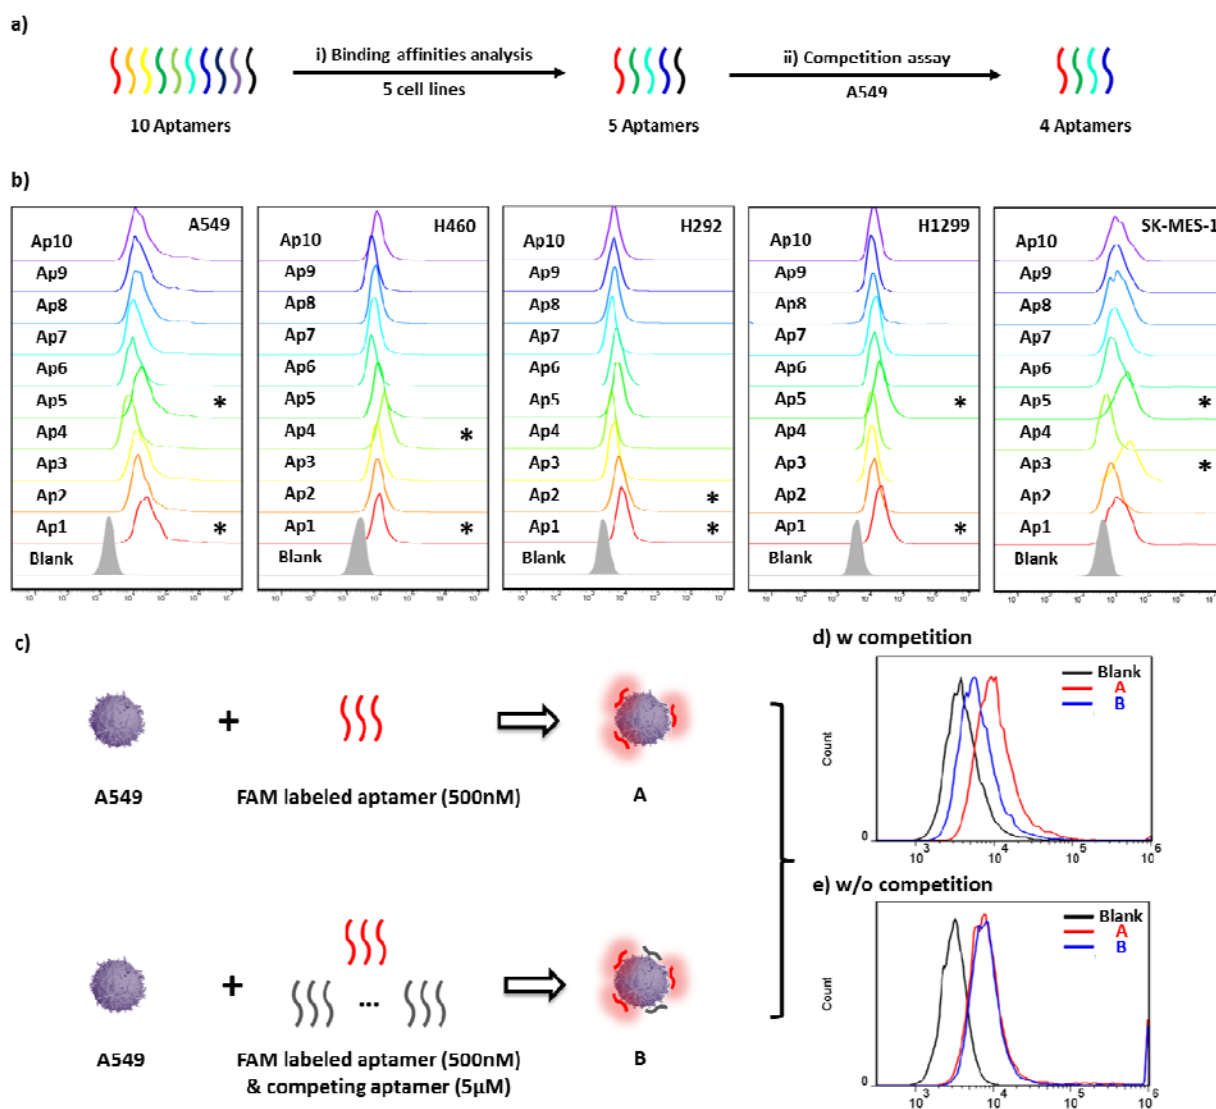

**Figure S1.** (a) The 4 aptamers finally used for formation of different cocktail capture agents (i.e. Ap1, Ap2, Ap3 and Ap4) were obtained following a two-step process: (i) the binding affinities analysis, and (ii) the competition assay. (b) Binding affinity analysis. The fluorescent intensity of NSCLC cells after incubation with 500 nM FAM labeled aptamer (i.e. Ap1 to Ap10) measured by flow cytometry. The best two aptamers with the highest binding affinity for each cell line were marked with (\*). (c) The schematic illustration of competition assay. Harvested A549 cells were divided into two equal aliquots, one aliquot A was incubated with 500 nM FAM labeled aptamer, the other aliquot B was incubated with 500 nM FAM labeled aptamer and 5  $\mu$ M competing aptamer which has no fluorescence. By comparing the peak shift of fluorescent intensity, it was possible to understand whether competition occurred between these two aptamers. For example, (d) Ap1 and Ap5, with competition, and (e) Ap1 and Ap2 without competition.

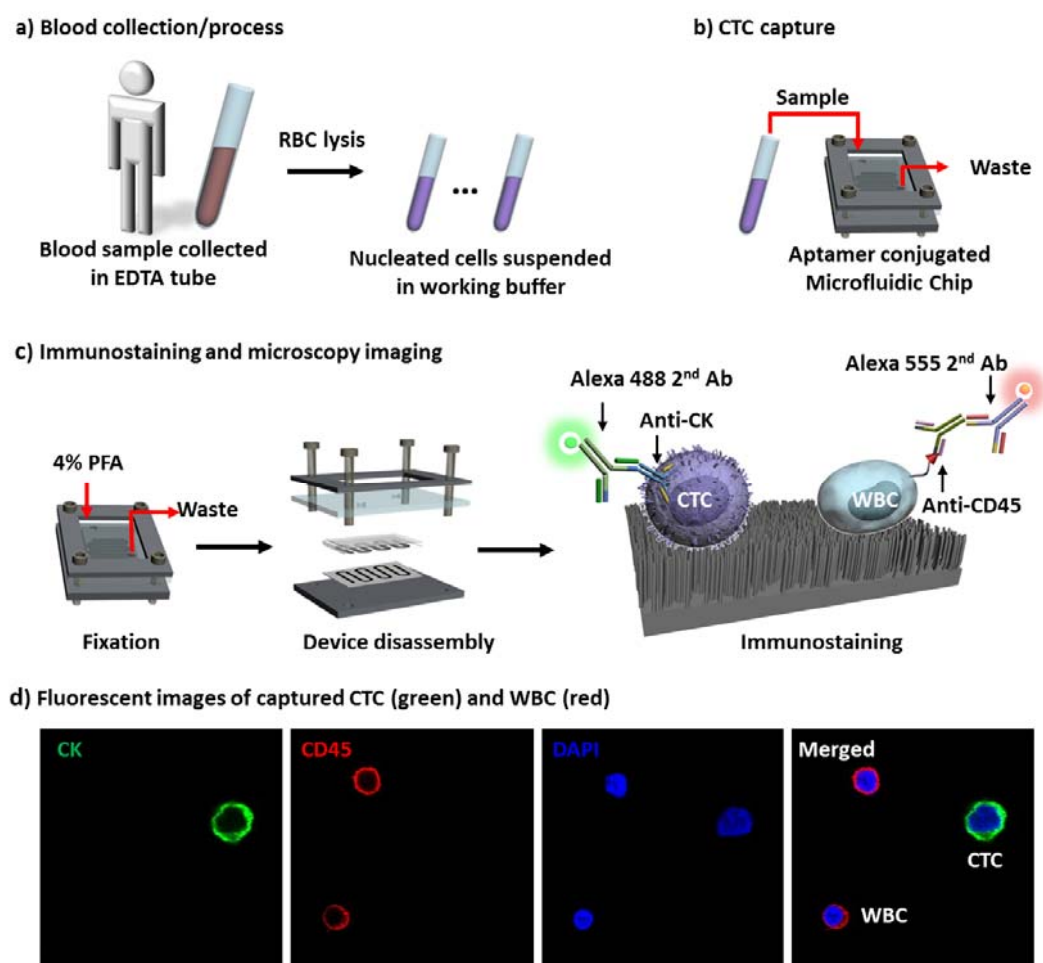

**Figure S2.** The schematic illustration of the general protocol for the processing of clinic samples. (a) Peripheral blood (3 mL-4 mL depending on the number of parallel study) was collected from each individual, subjected to red blood cell (RBC) lysis, and then split into equal aliquots. (b) 1-mL cell suspension was then loaded into a syringe and process through an aptamer conjugated NanoVelcro Chip for CTC capture. (c) Captured cells were fixed with 4% paraformaldehyde (PFA) prior to device disassembly. A three-color immunocytochemistry method based on Alexa 488 labeled anti-CK (green), Alexa 555 labeled anti-CD45 (red), and DAPI (blue) staining was employed for the identification of CTC from nonspecifically captured white blood cells (WBC). (d) Fluorescent images of captured CTC (green) and white blood cell (red).

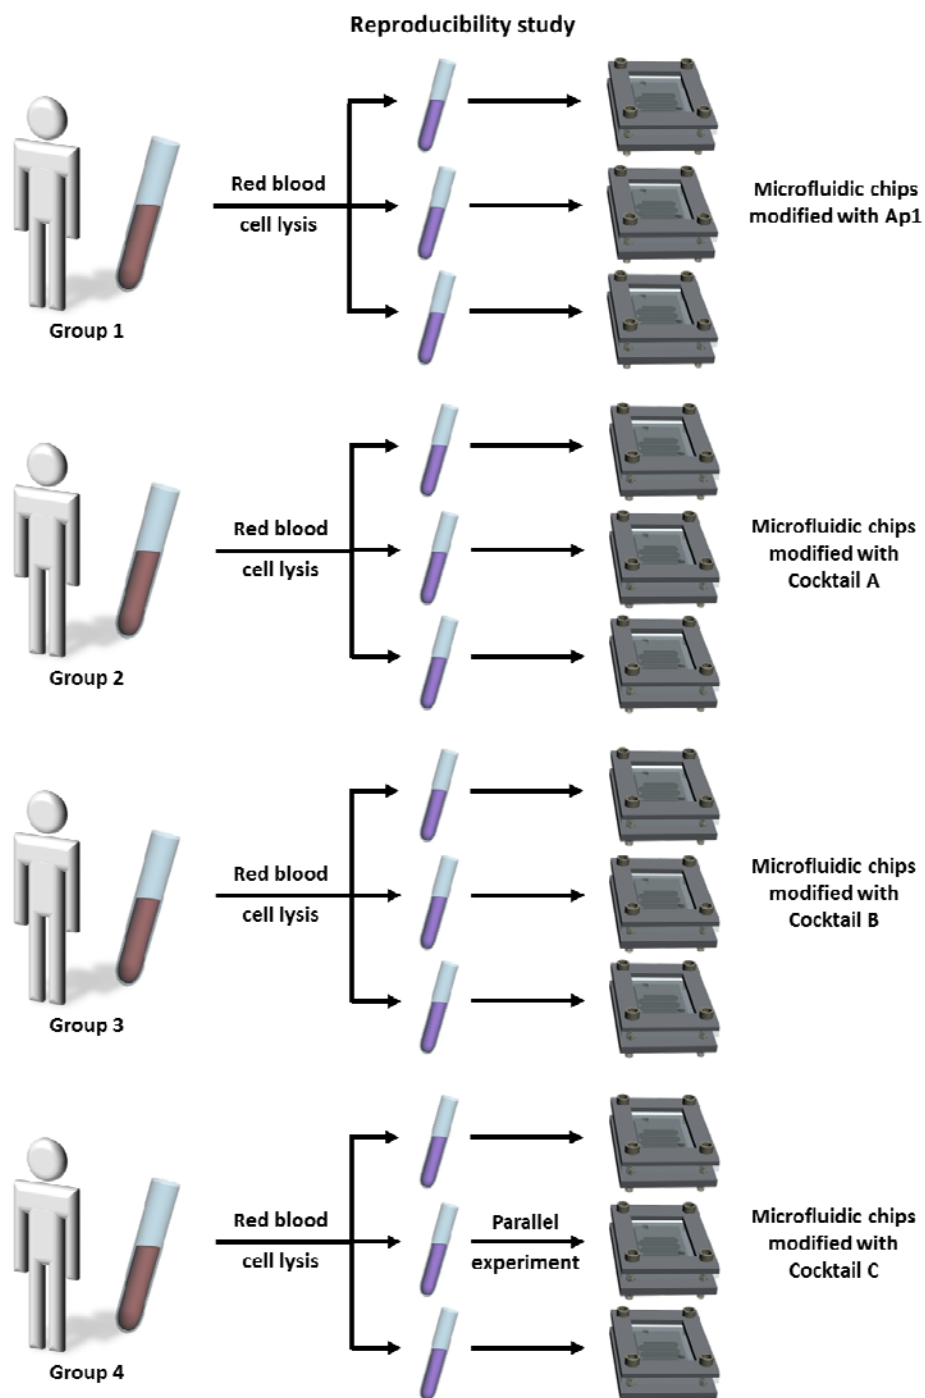

**Figure S3.** Schematic illustration of the reproducibility study. 12 patients and 12 healthy donors were divided into 4 groups. 3-mL blood was collected from each individual and then subjected to the triplicated CTC enumeration study using microfluidic chips modified with a specific combination of aptamers (i.e. Ap1, Cocktail A, Cocktail B, or Cocktail C). Captured cells were then enumerated under microscope.

**Table S2.** Detailed clinical information of NSCLC patients enrolled for parallel CTC enumeration studies

| <b>Patient</b> | <b>Sex</b> | <b>Age</b> | <b>Smoking Status</b> | <b>Pathology</b>        | <b>Clinical Stage</b> | <b>Metastatic Site</b>          |
|----------------|------------|------------|-----------------------|-------------------------|-----------------------|---------------------------------|
| <b>P13</b>     | M          | 65         | No                    | Adenocarcinoma          | IV                    | Both lung, bone                 |
| <b>P14</b>     | M          | 59         | Yes                   | Adenocarcinoma          | IV                    | Both lung, brain                |
| <b>P15</b>     | F          | 45         | No                    | Adenocarcinoma          | IV                    | Bone                            |
| <b>P16</b>     | M          | 60         | Yes                   | Adenocarcinoma          | IV                    | Both lung, liver, adrenal, bone |
| <b>P17</b>     | F          | 59         | No                    | Adenocarcinoma          | IV                    | Liver, pleura                   |
| <b>P18</b>     | M          | 76         | No                    | Adenocarcinoma          | IV                    | Pleura                          |
| <b>P19</b>     | M          | 45         | No                    | Adenocarcinoma          | IV                    | Both lung, bone                 |
| <b>P20</b>     | F          | 58         | No                    | Adenocarcinoma          | IV                    | Both lung, liver, brain         |
| <b>P21</b>     | M          | 56         | Yes                   | Squamous cell carcinoma | IV                    | Both lung                       |
| <b>P22</b>     | M          | 59         | Yes                   | Squamous cell carcinoma | IV                    | Lung, bone, brain               |
| <b>P23</b>     | M          | 70         | Yes                   | Squamous cell carcinoma | IV                    | Liver, bone                     |

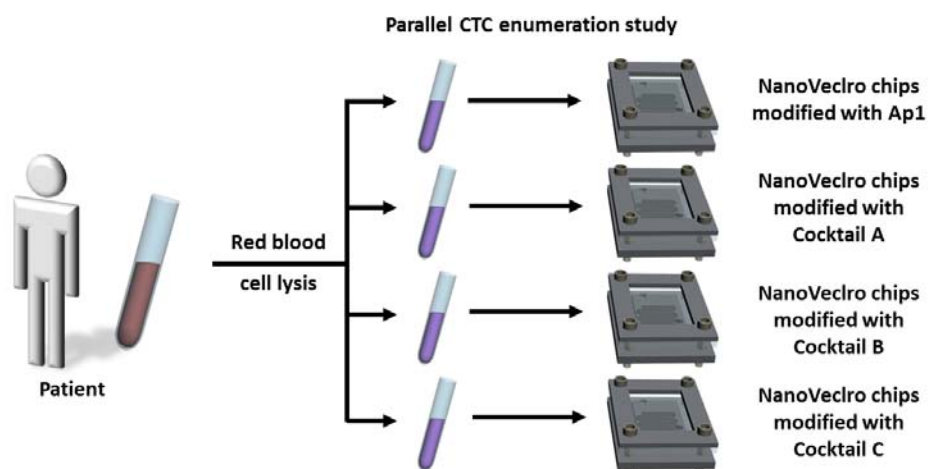

**Figure S4.** Schematic illustration of the parallel CTC enumeration study. 4 mL blood sample collected from the same patient was divided into 4 equal aliquots and process through microfluidic devices modified with 4 different combinations of aptamers (i.e. Ap1, Cocktail A, Cocktail B, or Cocktail C).



**Table S3.** Side by side comparison of anti-EpCAM and aptamer(s) in the detection of clinical samples

|            | <b>Anti-EpCAM</b> | <b>Ap1</b> | <b>Cocktail A</b> | <b>Cocktail B</b> | <b>Cocktail C</b> |
|------------|-------------------|------------|-------------------|-------------------|-------------------|
| <b>P24</b> | 0                 | 1          | 0                 | 1                 | 3                 |
| <b>P25</b> | 2                 | 1          | 4                 | 3                 | 6                 |
| <b>P26</b> | 4                 | 2          | 2                 | 9                 | 4                 |
